# Supplementary material for: Structure effects of amphiphilic and non-amphiphilic quaternary ammonium salts on photodegradation of Alizarin Red-S catalyzed by titanium dioxide
Source: Royal Society of Chemistry journal article supplement (doi:10.1039/c6ra25421g), 2016-12-24

## Supplementary Information

For

# STRUCTURE EFFECTS OF AMPHIPHILIC AND NON-AMPHIPHILIC QUATERNARY AMMONIUM SALTS ON PHOTODEGRADATION OF ALIZARIN RED-S CATALYZED BY TITANIUM DIOXIDE

Paola Anastasio,<sup>a</sup> Tiziana Del Giacco,<sup>\*ab</sup> Raimondo Germani,<sup>\*ab</sup> Nicoletta Spreti<sup>c</sup> and Matteo Tiecco<sup>a</sup>

\*Corresponding author. Fax: +39 755855560.

E-mail addresses: tiziana.delgiacco@unipg.it (T. Del Giacco), raimondo.germani@unipg.it (R. Germani).

**Fig. S1. Absorption spectra of the ARS photodegradation with TiO<sub>2</sub> recorded in the presence of various CTABr concentrations at pH 12.** S2

**Fig. S2. Absorption spectra of the ARS photodegradation with TiO<sub>2</sub> recorded in the presence of various CTBABr concentrations at pH 12.** S2

**Table S1, S2 and S3: numerical values corresponding to Fig. 1, Fig. 2 and Fig. 3, respectively.** S3

**Table S4 and S5: numerical values corresponding to Fig. 4 and Fig. 5, respectively.** S4

**Fig. S3. Photodegradation of ARS with TiO<sub>2</sub> at pH 12 after 15 min of irradiation as a function of ObisDTABr and DTABr concentration.** S5

**Table S6: numerical values corresponding to Fig. S3.** S5

**LCMS-ESI analysis of the ARS photodegradation with TiO<sub>2</sub> in the presence of of CTABr at pH 12 after 15 min of irradiation.** S6

**FT-IR analysis of the CTABr photodegradation in the presence of TiO<sub>2</sub> at pH 12.** S7

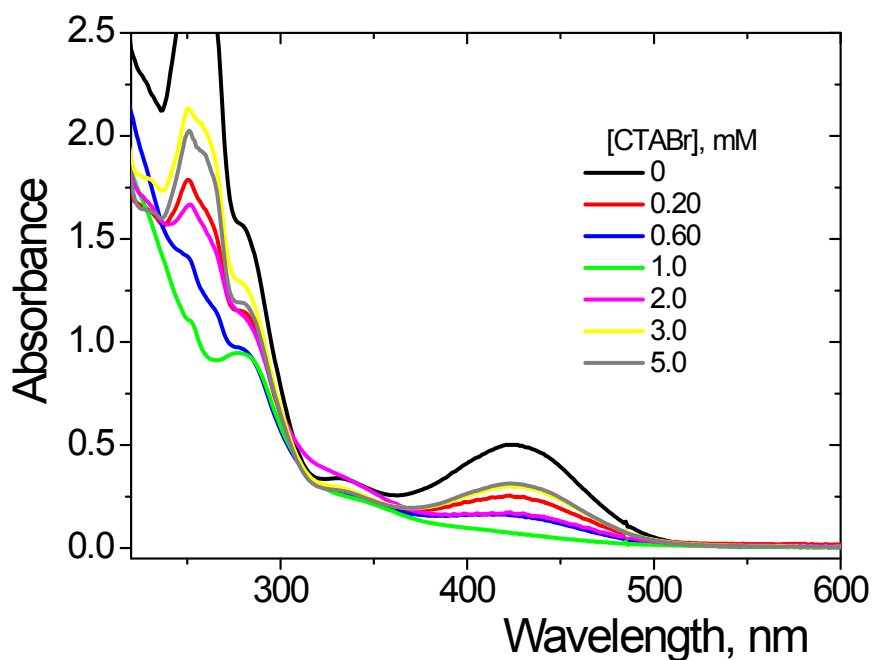

**Fig. S1.** Absorption spectra of the ARS photodegradation (0.20 mM) in TiO<sub>2</sub> aqueous dispersion (0.4 g/l) after 15 min irradiation in the presence of various CTABr concentrations at pH 12.

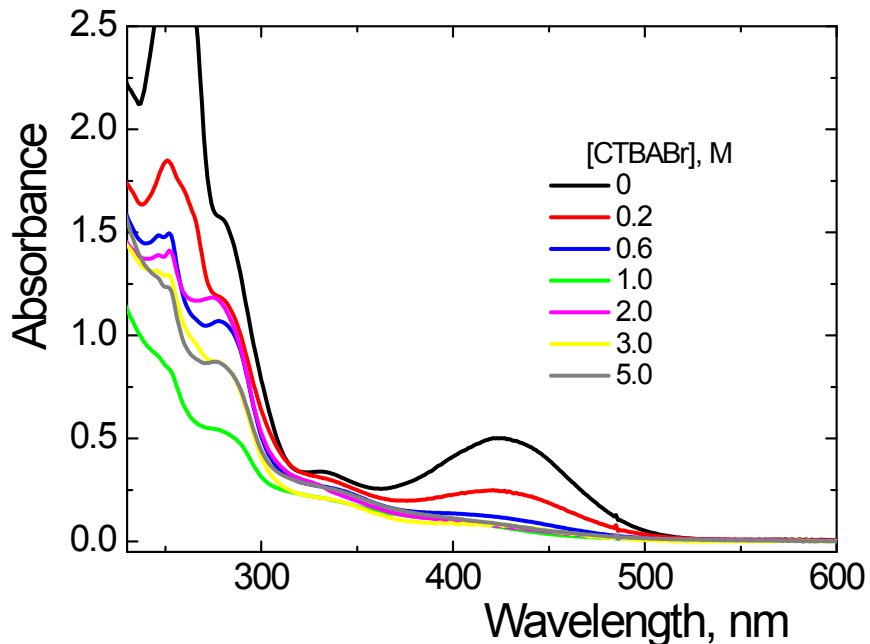

**Fig. S2.** Absorption spectra of the ARS photodegradation (0.20 mM) in TiO<sub>2</sub> aqueous dispersion (0.4 g/l) after 15 min irradiation in the presence of various CTBABr concentrations at pH 12.

**Table S1**

Numerical values corresponding to Fig. 1

| [CTABr], M | $C_{15}/C_0$ | [CTEABr], M | $C_{15}/C_0$ | [CTPABr], M | $C_{15}/C_0$ | [CTBABr], M | $C_{15}/C_0$ |
|------------|--------------|-------------|--------------|-------------|--------------|-------------|--------------|
| 0          | 0.857        | 0           | 0.857        | 0           | 0.857        | 0           | 0.857        |
| 0.2        | 0.55861      | 0.2         | 0.67         | 0.2         | 0.7          | 0.2         | 0.54553      |
| 0.6        | 0.30116      | 0.6         | 0.22         | 0.6         | 0.41186      | 0.6         | 0.23257      |
| 1          | 0.135        | 1           | 0.104        | 1           | 0.16         | 1           | 0.15         |
| 2          | 0.38         | 2           | 0.18         | 2           | 0.12         | 2           | 0.16         |
| 3          | 0.58         | 3           | 0.37         | 3           | 0.18         | 3           | 0.17         |
| 5          | 0.6          | 5           | 0.4          | 5           | 0.21         | 5           | 0.17         |

**Table S2**

Numerical values corresponding to Fig. 2

| [ObisCTABr], M | $C_{15}/C_0$ | [CTEABr], M | $C_{15}/C_0$ |
|----------------|--------------|-------------|--------------|
| 0              | 0.857        | 0           | 0.857        |
| 0.0467         | 0.825        | 0.2         | 0.55861      |
| 0.0986         | 0.686        | 0.6         | 0.30116      |
| 0.15           | 0.437        | 1           | 0.15         |
| 0.2            | 0.35         | 2           | 0.38         |
| 0.607          | 0.593        | 3           | 0.58         |
| 1              | 0.755        | 5           | 0.6          |
| 2              | 0.866        |             |              |
| 3.01           | 0.838        |             |              |
| 4              | 0.825        |             |              |
| 5              | 0.825        |             |              |

**Table S3**

Numerical values corresponding to Fig. 3

| [TMABr], M | $C_{15}/C_0$ | [TBABr], M | $C_{15}/C_0$ | [TPABr], M | $C_{15}/C_0$ | [TEABr], M | $C_{15}/C_0$ |
|------------|--------------|------------|--------------|------------|--------------|------------|--------------|
| 0          | 0.924        | 0          | 0.924        | 0          | 0.924        | 0          | 0.924        |
| 0.221      | 0.90105      | 0.211      | 0.824        | 0.05       | 0.9265       | 0.5        | 0.945        |
| 0.61       | 0.92341      | 0.608      | 0.762        | 0.4        | 0.862        | 5          | 0.777        |
| 1.08       | 0.90816      | 1.04       | 0.729        | 1          | 0.855        | 10         | 0.6737       |
| 2.01       | 0.91378      | 2.02       | 0.705        | 4          | 0.729        | 25         | 0.55         |
| 3          | 0.89849      | 3.04       | 0.642        | 7          | 0.67897      | 50         | 0.422        |
| 5.04       | 0.8954       | 5.01       | 0.523        | 10         | 0.642        | 100        | 0.427        |
| 30         | 0.8686       | 10         | 0.444        | 25         | 0.45699      |            |              |
| 50         | 0.842        | 25         | 0.231        | 50         | 0.242        |            |              |
| 100        | 0.81534      | 50         | 0.103        | 100        | 0.24796      |            |              |

**Table S4**

Numerical values corresponding to Fig. 4

| [TPABr], M | $C_{15}/C_0$ | [ASBr], M | $C_{15}/C_0$ | [BQBr], M | $C_{15}/C_0$ | [BPyBr], M | $C_{15}/C_0$ |
|------------|--------------|-----------|--------------|-----------|--------------|------------|--------------|
| 0          | 0.924        | 0         | 0.924        | 0         | 0.924        | 0          | 0.924        |
| 0.05       | 0.9265       | 0.05      | 0.879        | 0.056     | 0.877        | 0.05       | 0.992        |
| 0.4        | 0.862        | 0.4       | 0.794        | 0.403     | 0.857        | 0.4        | 0.931        |
| 1          | 0.855        | 0.7       | 0.7065       | 1         | 0.68984      | 1          | 0.87329      |
| 4          | 0.729        | 1         | 0.5988       | 5         | 0.459        | 5          | 0.774        |
| 7          | 0.67897      | 4         | 0.43068      | 10        | 0.15181      | 10         | 0.688        |
| 10         | 0.642        | 10        | 0.117        | 30        | 0.14295      | 30         | 0.625        |
| 30         | 0.5373       | 30        | 0.108        | 50        | 0.1497       | 50         | 0.579        |
| 50         | 0.45699      | 50        | 0.1143       |           |              |            |              |

**Table S5**

Numerical values corresponding to Fig. 5

| [ASBr], M | $C_{15}/C_0$ | [DASBr], M | $C_{15}/C_0$ |
|-----------|--------------|------------|--------------|
| 0         | 0.924        | 0          | 0.924        |
| 0.05      | 0.879        | 0.05       | 0.928        |
| 0.4       | 0.794        | 0.4        | 0.682        |
| 0.7       | 0.7065       | 1          | 0.417        |
| 1         | 0.599        | 4          | 0.16989      |
| 4         | 0.43068      | 7          | 0.15         |
| 10        | 0.117        | 10         | 0.13317      |
| 30        | 0.113        | 30         | 0.13622      |

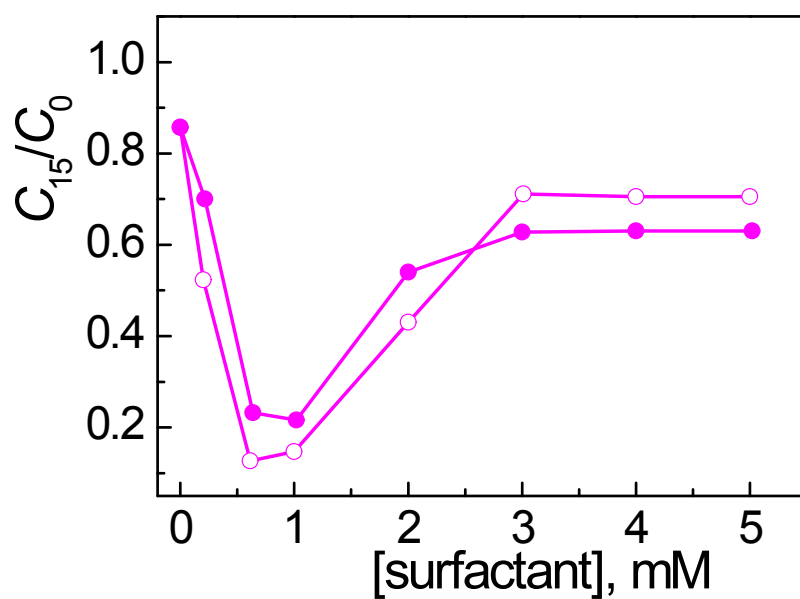

**Fig. S3.** Photodegradation of ARS (0.20 mM) with TiO<sub>2</sub> (0.4 g/l) at pH 12 after 15 min of irradiation as a function of ObisDTABr (○) and DTABr (●) concentration.

**Table S6**

Numerical values corresponding to Fig. S3

| [ObisDTABr], M | C <sub>15</sub> /C <sub>0</sub> | [DTABr], M | C <sub>15</sub> /C <sub>0</sub> |
|----------------|---------------------------------|------------|---------------------------------|
| 0              | 0.857                           | 0          | 0.857                           |
| 0.201          | 0.523                           | 0.214      | 0.7                             |
| 0.614          | 0.127                           | 0.636      | 0.232                           |
| 1              | 0.147                           | 1.02       | 0.216                           |
| 2              | 0.43                            | 2          | 0.5401                          |
| 3.01           | 0.711                           | 3          | 0.628                           |
| 4              | 0.705                           | 4          | 0.63                            |
| 5              | 0.705                           | 5.02       | 0.63                            |

LCMS-ESI analysis (negative ion acquisition) of the photodegradation of ARS (0.20 mM) with TiO<sub>2</sub> (0.4 g/l) in the presence of 1.0 mM CTABr at pH 12 after 15 min of irradiation.

Extract Ion Chromatogram:

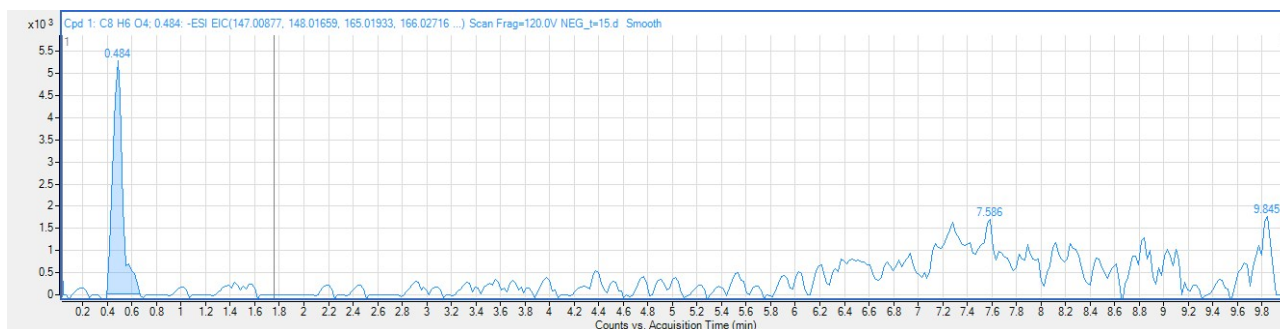

MS spectrum:

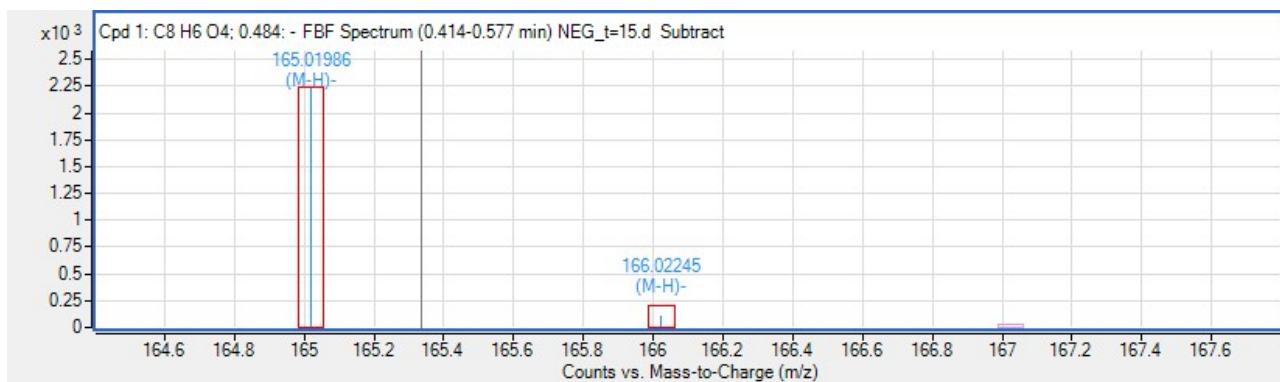

FT-IR analysis of the photostability of CTABr (50 mM) in the presence of TiO<sub>2</sub> (0.4 g/l) in 0.01 M NaOH.

FT-IR spectrum at initial time:

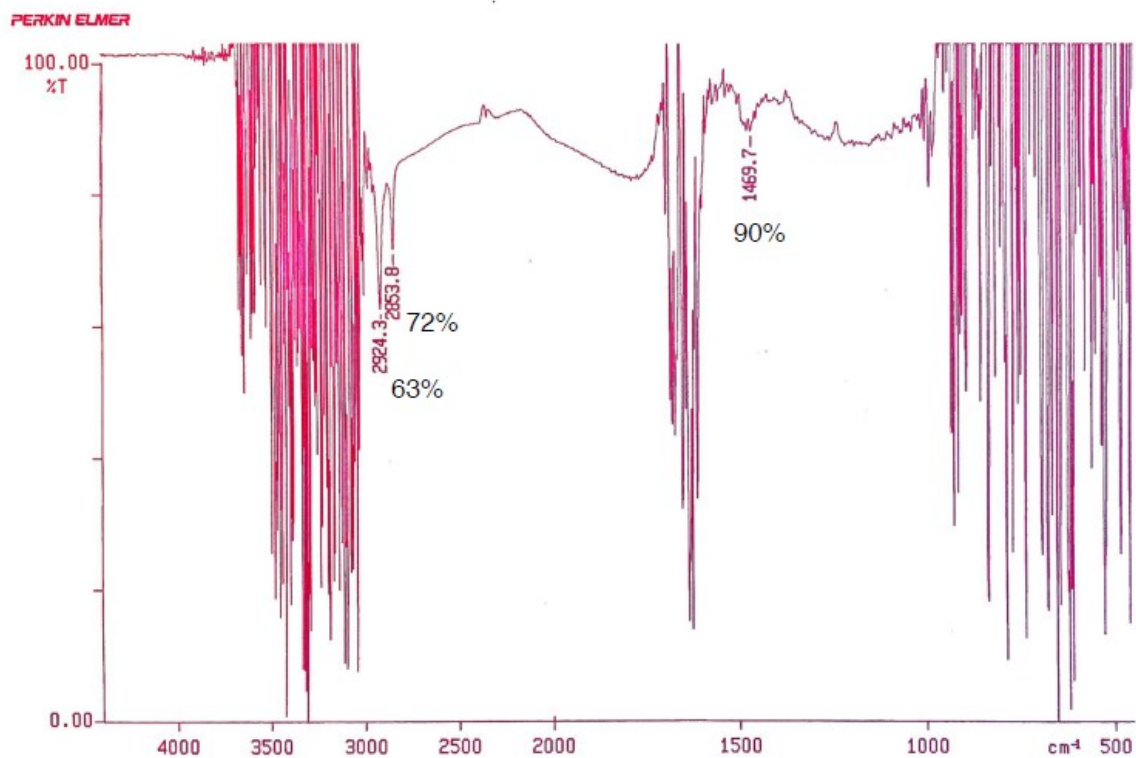

FT-IR spectrum after 30 min of irradiation:

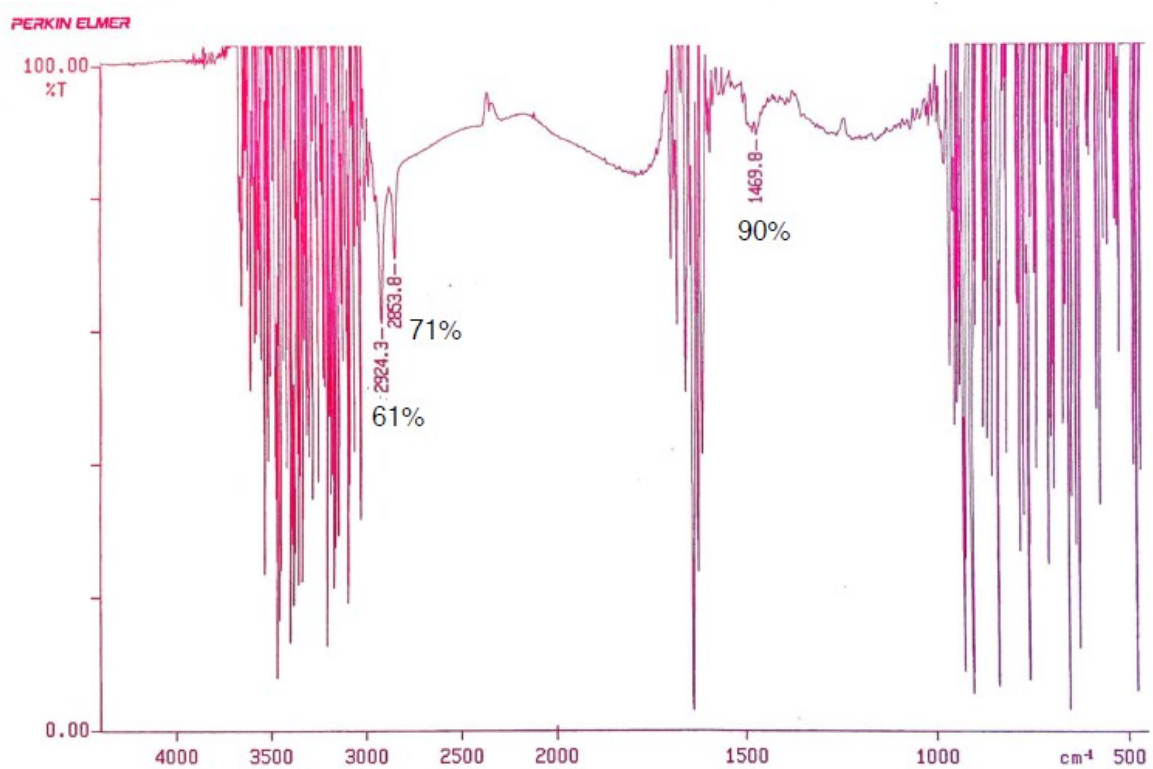

Supplement: c6ra25421g1.pdf [file c6ra25421g1.pdf]
